# Supplementary material for: Ultraclean transfer of CVD-grown graphene and its application to flexible organic photovoltaic cells
Source: Royal Society of Chemistry journal article supplement (doi:10.1039/c4ta03432e), 2014-10-23
Supplement: c4ta03432e1.pdf [file c4ta03432e1.pdf]

Cite this: DOI: 10.1039/c0xx00000x

www.rsc.org/xxxxxx

Communication

## Ultraclean Transfer of CVD-Grown Graphene and Its Application to Flexible Organic Photovoltaic Cells

Cheng Jin An, Seon Joon Kim, Hyung Ouk Choi, Dae Woo Kim, Sung Woo Jang, Ming Liang Jin, Jong-Min Park, Jong Kil Choi, and Hee-Tae Jung\*

5 Received (in XXX, XXX) Xth XXXXXXXXXX 20XX, Accepted Xth XXXXXXXXXX 20XX

DOI: 10.1039/b000000x

† Electronic Supplementary Information (ESI) available: [details of any supplementary information available should be included here]. See

10 DOI: 10.1039/b000000x/

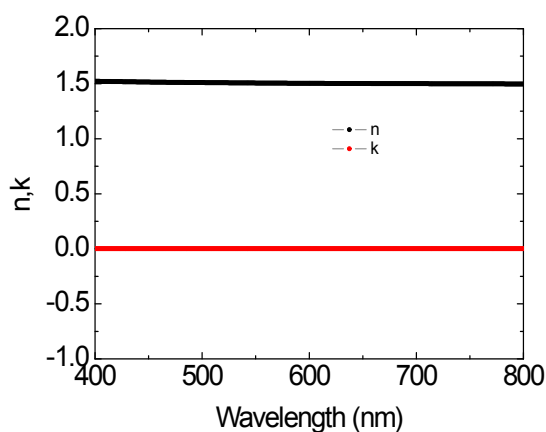

Fig. S1. Optical constants ( $n$  and  $\kappa$ ) used for the PMMA material in the transmittance simulation.
